# Supplementary material for: Using a Large Language Model to Identify Adolescent Patient Portal Account Access by Guardians
Source: PubMed Central journal article supplement (PMC11200138; doi:10.1001/jamanetworkopen.2024.18454), 2024-06-25
Supplement: jamanetwopen-e2418454-s002.pdf [file jamanetwopen-e2418454-s002.pdf]

## Data Sharing Statement

Liang. Using a Large Language Model to Identify Adolescent Patient Portal Account Access by Guardians. *JAMA Netw Open*. Published June 25, 2024.

doi:10.1001/jamanetworkopen.2024.18454

### Data

**Data available:** No

### Additional Information

**Explanation for why data not available:** Dataset includes patient-delivered messages containing PHI.
